# Supplementary material for: The Components of Self-Perceived Health in the Kailali District of Nepal: A Cross-Sectional Survey
Source: Int J Environ Res Public Health. 2015 Mar 17;12(3):3215–31. doi: 10.3390/ijerph120303215 (PMC4377960; doi:10.3390/ijerph120303215)
Supplement: Supplementary File 1 [file ijerph-12-03215-s001.pdf]

# The Components of Self-Perceived Health in the Kailali District of Nepal: A Cross-Sectional Survey

**Table S1.** Descriptive characteristics of the sample \*.

| Characteristics                                      | No. or Range   | % or Mean (SD)          |
|------------------------------------------------------|----------------|-------------------------|
| Gender ( <i>Respondents: 302</i> )                   |                |                         |
| Male                                                 | 160            | 52.98                   |
| Female                                               | 142            | 47.02                   |
| Age in years ( <i>Respondents: 302</i> )             | 12–84          | 40.32 (14.72)           |
| Marital Status ( <i>Respondents: 300</i> )           |                |                         |
| Married                                              | 274            | 91.33                   |
| Other                                                | 26             | 8.67                    |
| Family size ( <i>Respondents:304</i> )               | 2–20           | 6.31 (2.50)             |
| Education level ( <i>Respondents: 200</i> )          |                |                         |
| Primary                                              | 85             | 42.50                   |
| Lower Secondary                                      | 40             | 20.00                   |
| Secondary and Upper Secondary                        | 63             | 31.50                   |
| University                                           | 12             | 2.00                    |
| Income in Nepalese Rupee ( <i>Respondents: 263</i> ) | 2000–1,208,000 | 106,283.81 (171,248.11) |
| Self-perceived Health ( <i>Respondents: 304</i> )    |                |                         |
| Good                                                 | 244            | 80.30                   |
| Poor                                                 | 60             | 19.70                   |
| Drinking ( <i>Respondents: 289</i> )                 |                |                         |
| Current                                              | 89             | 30.80                   |
| Former                                               | 12             | 4.15                    |
| Never                                                | 188            | 65.05                   |
| Smoking ( <i>Respondents: 300</i> )                  |                |                         |
| Current                                              | 73             | 24.33                   |
| Former                                               | 12             | 4.00                    |
| Never                                                | 215            | 71.67                   |
| Regular Exercise ( <i>Respondents: 299</i> )         |                |                         |
| Yes                                                  | 32             | 10.70                   |
| No                                                   | 267            | 89.30                   |
| Happiness Level ( <i>Respondents: 302</i> )          |                |                         |
| Happy                                                | 131            | 43.38                   |
| Moderate                                             | 154            | 50.99                   |
| Unhappy                                              | 17             | 5.63                    |
| Suicide attempt ( <i>Respondents: 300</i> )          |                |                         |
| Yes                                                  | 6              | 2.00                    |
| No                                                   | 294            | 98.00                   |
| Chronic disease ( <i>Respondents: 301</i> )          |                |                         |
| Yes                                                  | 24             | 7.97                    |
| No                                                   | 277            | 92.03                   |

**Table S1.** *Cont.*

| <b>Characteristics</b>                                            | <b>No. or Range</b> | <b>% or Mean (SD)</b> |
|-------------------------------------------------------------------|---------------------|-----------------------|
| Satisfaction with healthcare services ( <i>Respondents: 299</i> ) |                     |                       |
| Dissatisfied                                                      | 27                  | 9.03                  |
| Fair                                                              | 183                 | 61.20                 |
| Satisfied                                                         | 79                  | 26.42                 |

\* Prior to imputation of the missing data.

© 2015 by the authors; licensee MDPI, Basel, Switzerland. This article is an open access article distributed under the terms and conditions of the Creative Commons Attribution license (<http://creativecommons.org/licenses/by/4.0/>).
